# Supplementary material for: Severity- and Time-Dependent Activation of Microglia in Spinal Cord Injury
Source: MDPI journal article supplement (doi:10.3390/ijms24098294), 2023-05-05
Supplement: s1 [file s1]

**Supplementary Table S1.** Primers and probes for RT-PCR

| <b>Primer</b>             | <b>Nucleotide sequence</b> |
|---------------------------|----------------------------|
| 18S-TM-Forward            | GCCGCTAGAGGTGAAATTCTTG     |
| 18S-TM-Reverse            | CATTCTTGGCAAATGCTTTCG      |
| Iba1-TM-Forward           | ACCAGCGTCTGAGGAGCTAT       |
| Iba1-TM-Reverse           | AGGAAGTGCTTGTTGATCCC       |
| CD209-TM-Forward          | CCTCTCCCAAGTCAGCAGAA       |
| CD209-TM-Reverse          | CACACCATTTCACACAGCCA       |
| TGF- $\beta$ -TM-Forward  | TGCTTCAGCTCCACAGAGAA       |
| TGF- $\beta$ -TM-Reverse  | TCCAGGCTCCAAATGTAGGG       |
| IL-6-TM-Forward           | TGCCTTCTTGGGACTGATGT       |
| IL-6-TM-Reverse           | CTGGTCTGTTGTGGGTGGTA       |
| CD40-TM-Forward           | AGTGACAAACAGTACCTCCAAGG    |
| CD40-TM-Reverse           | TTGATTGAGTTCGCAGTGTCGG     |
| TNF- $\alpha$ -TM-Forward | CCGTCCCTCTCATACACTGG       |
| TNF- $\alpha$ -TM-Reverse | GTGCTCATGGTGTCTTTCC        |
| CCL-22-TM-Forward         | TTCTTGCTGTGGCACTTCAG       |
| CCL-22-TM-Reverse         | CTCCTTCACGAAACGTGGTG       |
| IL-1 $\beta$ -TM-Forward  | GGGATGATGACGACCTGCTA       |
| IL-1 $\beta$ -TM-Reverse  | TGTCGTTGCTTGTCTCTCCT       |

**Supplementary Table S2.** Cytokine concentrations (pg/ml) of microglia supernatants on the model of SCI *in vitro*.

| Groups  |        | IL-1 $\alpha$                   | IL-2                               | GRO/KC                              | RANTES                           | G-CSF                         | MIP-1 $\alpha$                    | IL-6                                 | MIP-3 $\alpha$                       |
|---------|--------|---------------------------------|------------------------------------|-------------------------------------|----------------------------------|-------------------------------|-----------------------------------|--------------------------------------|--------------------------------------|
| Medium  |        | 4,7 $\pm$ 2,21                  | 15,55 $\pm$ 9,5                    | 209,12 $\pm$ 16                     | 14,63 $\pm$ 1,38                 | 4,29 $\pm$ 0,02               | 160,39 $\pm$ 51,31                | 130,14 $\pm$ 13,72                   | 323,26 $\pm$ 152,8                   |
| ISC     |        | 2,06 $\pm$ 0,27                 | 50,29 $\pm$ 25,92                  | 124,44 $\pm$ 71,69                  | N/A                              | 5,28 $\pm$ 2,87               | 43,1 $\pm$ 21,49 <sup>#</sup>     | 24,23 $\pm$ 9,38 <sup>#</sup>        | 326,65 $\pm$ 92,43                   |
| SCI 1.5 | 3 dpi  | 2,26 $\pm$ 0,38                 | 56,7 $\pm$ 29,21                   | 174,63 $\pm$ 56,26                  | 23,17 $\pm$ 1,14                 | 4,64 $\pm$ 0,69               | 610,43 $\pm$ 38,31 <sup>***</sup> | 4575,13 $\pm$ 1197,74 <sup>#</sup>   | 434 $\pm$ 162,21                     |
|         | 7 dpi  | 105,36 $\pm$ 57,58 <sup>#</sup> | 48,76 $\pm$ 19,58                  | 157,83 $\pm$ 42,75                  | 208,9 $\pm$ 122,05 <sup>#</sup>  | 9,9 $\pm$ 3,73 <sup>#</sup>   | 71,76 $\pm$ 17,99                 | 17,87 $\pm$ 6,69                     | 496,61 $\pm$ 183,17                  |
|         | 14 dpi | 24,91 $\pm$ 4,18                | 41,95 $\pm$ 15,96                  | 146,47 $\pm$ 28,34                  | 99,72 $\pm$ 36,8 <sup>#</sup>    | 29,11 $\pm$ 9,63 <sup>#</sup> | 16,79 $\pm$ 10,1                  | 18,54 $\pm$ 6,66                     | 200,87 $\pm$ 27,21                   |
|         | 60 dpi | 102,15 $\pm$ 16,81 <sup>#</sup> | 798,56 $\pm$ 38,75 <sup>#</sup>    | 1023,61 $\pm$ 113,1 <sup>#</sup>    | 212,96 $\pm$ 88,34 <sup>#</sup>  | 23,14 $\pm$ 9,76 <sup>#</sup> | 1184,54 $\pm$ 154,39 <sup>#</sup> | 8336,89 $\pm$ 1230,99 <sup>#</sup>   | 1832,8 $\pm$ 238,57 <sup>#</sup>     |
| SCI 2.5 | 3 dpi  | 21,78 $\pm$ 19,73               | 199,32 $\pm$ 38,44 <sup>#</sup>    | 456,63 $\pm$ 151,32 <sup>#</sup>    | 264,79 $\pm$ 40 <sup>#</sup>     | 24,78 $\pm$ 8,34 <sup>#</sup> | 219,72 $\pm$ 54,44 <sup>*</sup>   | 4774,13 $\pm$ 1126,68 <sup>#</sup>   | 880,55 $\pm$ 101,99 <sup>#</sup>     |
|         | 7 dpi  | 2,24 $\pm$ 0,51                 | 52,01 $\pm$ 14,73                  | 164,14 $\pm$ 41,13                  | 22,42 $\pm$ 7,82                 | N/A                           | 24,28 $\pm$ 9,76                  | 22,23 $\pm$ 7,93                     | 185,63 $\pm$ 15,08                   |
|         | 14 dpi | 36,91 $\pm$ 1,22                | 33,44 $\pm$ 12,18                  | 488,44 $\pm$ 73,37 <sup>#</sup>     | N/A                              | N/A                           | 42,85 $\pm$ 20,25                 | 2421,3 $\pm$ 889,92 <sup>#</sup>     | 99,75 $\pm$ 35,76 <sup>#</sup>       |
|         | 60 dpi | 2,07 $\pm$ 0,69 <sup>**</sup>   | N/A                                | 144,11 $\pm$ 13,09                  | 12,23 $\pm$ 1,86                 | N/A                           | 48,58 $\pm$ 16,57 <sup>**</sup>   | 514,47 $\pm$ 85,49 <sup>#</sup>      | 90,99 $\pm$ 30,09 <sup>#</sup>       |
| SCI 4   | 3 dpi  | 2,19 $\pm$ 0,66                 | 522,79 $\pm$ 109,18 <sup>***</sup> | 224,36 $\pm$ 65                     | N/A                              | 4,3 $\pm$ 2,47                | 500,23 $\pm$ 58,66 <sup>#</sup>   | 2127,49 $\pm$ 582,49 <sup>***</sup>  | 136,99 $\pm$ 14 <sup>#</sup>         |
|         | 7 dpi  | 112,09 $\pm$ 28,69 <sup>#</sup> | 890,93 $\pm$ 461,75 <sup>***</sup> | 652,1 $\pm$ 43,54 <sup>***</sup>    | 449,94 $\pm$ 169,32 <sup>#</sup> | 57,22 $\pm$ 9,63 <sup>#</sup> | 673,1 $\pm$ 88,26 <sup>***</sup>  | 8084,12 $\pm$ 83,06 <sup>***</sup>   | 534,74 $\pm$ 105,58                  |
|         | 14 dpi | 78,54 $\pm$ 19,81               | 628,53 $\pm$ 84,64 <sup>***</sup>  | 871,41 $\pm$ 99,93 <sup>***</sup>   | 392,09 $\pm$ 114,93 <sup>#</sup> | 25,88 $\pm$ 9,57 <sup>#</sup> | 541,44 $\pm$ 77,79 <sup>***</sup> | 6070,33 $\pm$ 1110,52 <sup>***</sup> | 403,71 $\pm$ 61,93                   |
|         | 60 dpi | 131,08 $\pm$ 22,43 <sup>#</sup> | N/A                                | 1010,24 $\pm$ 88,33 <sup>#</sup>    | 325,57 $\pm$ 45,66 <sup>#</sup>  | 14,11 $\pm$ 3,24 <sup>#</sup> | 1283,97 $\pm$ 285,66 <sup>#</sup> | 11596,18 $\pm$ 3115,47 <sup>#</sup>  | 4270,88 $\pm$ 1550,15 <sup>***</sup> |
| Groups  |        | TNF- $\alpha$                   | MCP-1                              | VEGF                                | IL-4                             | IL-13                         | IL-17                             | IL-10                                | IL-1 $\beta$                         |
| Medium  |        | 30,38 $\pm$ 19,75               | 1402,96 $\pm$ 189,58               | 19,10 $\pm$ 5,13                    | N/A                              | N/A                           | 4,4 $\pm$ 3,1                     | N/A                                  | 8,84 $\pm$ 5,22                      |
| ISC     |        | 32,4 $\pm$ 18                   | 664,66 $\pm$ 18,1 <sup>#</sup>     | 62,64 $\pm$ 9,98 <sup>#</sup>       | 14,93 $\pm$ 10,62                | N/A                           | 2,36 $\pm$ 0,64                   | N/A                                  | N/A                                  |
| SCI 1.5 | 3 dpi  | 39,49 $\pm$ 18,85               | 908,39 $\pm$ 350,53                | 53,9 $\pm$ 43,82                    | 15,05 $\pm$ 2,56                 | N/A                           | 6,51 $\pm$ 0,72                   | N/A                                  | 2,26 $\pm$ 0,38                      |
|         | 7 dpi  | 146,29 $\pm$ 18,1 <sup>#</sup>  | 1262,66 $\pm$ 539,74               | 49,1 $\pm$ 23,4 <sup>#</sup>        | 27,77 $\pm$ 13,66                | N/A                           | 6,21 $\pm$ 3,34                   | N/A                                  | 105,36 $\pm$ 57,58 <sup>#</sup>      |
|         | 14 dpi | 73,86 $\pm$ 32,81               | 2147,63 $\pm$ 914,35 <sup>*</sup>  | 53,45 $\pm$ 19,78                   | 40,03 $\pm$ 21,28                | 23,61 $\pm$ 2,43              | 4,65 $\pm$ 2,42                   | 384,36 $\pm$ 2,6                     | 24,91 $\pm$ 4,18                     |
|         | 60 dpi | 176,1 $\pm$ 19,32 <sup>#</sup>  | 4574,61 $\pm$ 1640,27 <sup>*</sup> | 1327,72 $\pm$ 471,1 <sup>#</sup>    | 35,13 $\pm$ 10,45                | 114,75 $\pm$ 38,1             | 8,65 $\pm$ 3,77                   | 964,07 $\pm$ 102,89 <sup>**</sup>    | 102,15 $\pm$ 16,81 <sup>#</sup>      |
| SCI 2.5 | 3 dpi  | 35,75 $\pm$ 13,13               | 3113,54 $\pm$ 1831 <sup>*</sup>    | 49,12 $\pm$ 10,39 <sup>#</sup>      | 21,98 $\pm$ 8,08                 | N/A                           | 5,92 $\pm$ 2,23                   | 522,94 $\pm$ 150,46 <sup>**</sup>    | 21,78 $\pm$ 19,73                    |
|         | 7 dpi  | 30,06 $\pm$ 9,77                | 658,15 $\pm$ 322,58                | 51,31 $\pm$ 16,13 <sup>#</sup>      | 4,32 $\pm$ 1,98                  | N/A                           | N/A                               | 22,07 $\pm$ 8,16                     | 2,24 $\pm$ 0,51                      |
|         | 14 dpi | N/A                             | 2614 $\pm$ 543 <sup>#</sup>        | N/A                                 | 22,97 $\pm$ 12,66                | N/A                           | 2,6 $\pm$ 0,39                    | 335,96 $\pm$ 53,39                   | 36,91 $\pm$ 1,22                     |
|         | 60 dpi | N/A                             | 279,42 $\pm$ 137,35 <sup>#</sup>   | 26,67 $\pm$ 8,84                    | N/A                              | N/A                           | N/A                               | 137,57 $\pm$ 14,34                   | 2,07 $\pm$ 0,69 <sup>**</sup>        |
| SCI 4   | 3 dpi  | 36,87 $\pm$ 11,9                | 513,69 $\pm$ 117,25 <sup>#</sup>   | 32,51 $\pm$ 19,45                   | N/A                              | N/A                           | N/A                               | N/A                                  | 2,19 $\pm$ 0,66                      |
|         | 7 dpi  | 96,93 $\pm$ 43,79               | 3330,6 $\pm$ 1328,14 <sup>#</sup>  | 396,41 $\pm$ 90,28 <sup>***</sup>   | 26,81 $\pm$ 11,26                | N/A                           | 8,98 $\pm$ 2,51                   | 1460,83 $\pm$ 63,76 <sup>**</sup>    | 112,09 $\pm$ 28,69 <sup>#</sup>      |
|         | 14 dpi | 37,34 $\pm$ 31,27               | 3456,79 $\pm$ 467,94 <sup>#</sup>  | 1162,57 $\pm$ 351,23 <sup>#</sup>   | 35,89 $\pm$ 10,24                | N/A                           | 9,22 $\pm$ 3,61                   | 1410,03 $\pm$ 171,2 <sup>**</sup>    | 78,54 $\pm$ 19,81                    |
|         | 60 dpi | 191,66 $\pm$ 66,49 <sup>#</sup> | 5505,5 $\pm$ 1254 <sup>#</sup>     | 2398,31 $\pm$ 183,23 <sup>***</sup> | 53,97 $\pm$ 13,63 <sup>*</sup>   | N/A                           | 15,34 $\pm$ 1,32 <sup>#</sup>     | 1747,53 $\pm$ 334,55 <sup>**</sup>   | 131,08 $\pm$ 22,43 <sup>#</sup>      |

| Groups  |        | IL-5              | IL-7              | IL-12           | IL-18              | M-CSF           | GM-CSF           | IFN- $\gamma$      |
|---------|--------|-------------------|-------------------|-----------------|--------------------|-----------------|------------------|--------------------|
| Medium  |        | N/A               | N/A               | N/A             | N/A                | N/A             | N/A              | 11,58 $\pm$ 7,13   |
| ISC     |        | N/A               | N/A               | 9,63 $\pm$ 2,82 | N/A                | N/A             | N/A              | 11,8 $\pm$ 5,92    |
| SCI 1.5 | 3 dpi  | N/A               | N/A               | N/A             | N/A                | 6,97 $\pm$ 3,46 | N/A              | 12,56 $\pm$ 6,1    |
|         | 7 dpi  | 11,98 $\pm$ 7,2   | 19,7 $\pm$ 10,44  | N/A             | N/A                | N/A             | N/A              | 12,14 $\pm$ 6,61   |
|         | 14 dpi | 46,41 $\pm$ 19,88 | 9,31 $\pm$ 0,62   | N/A             | 62,26 $\pm$ 31,81  | N/A             | 10,32 $\pm$ 7,2  | 21,38 $\pm$ 6,93   |
|         | 60 dpi | 54,76 $\pm$ 25,55 | 56,66 $\pm$ 16,43 | N/A             | N/A                | N/A             | 25,44 $\pm$ 8,02 | 22,52 $\pm$ 4,29   |
| SCI 2.5 | 3 dpi  | 25,26 $\pm$ 13,83 | N/A               | N/A             | N/A                | N/A             | 8,43 $\pm$ 2,65  | 14,97 $\pm$ 4,05   |
|         | 7 dpi  | 9,9 $\pm$ 4,2     | N/A               | N/A             | N/A                | N/A             | N/A              | 11,86 $\pm$ 6,85   |
|         | 14 dpi | 32,85 $\pm$ 16,7  | N/A               | N/A             | 59,33 $\pm$ 27,77  | N/A             | N/A              | 13,44 $\pm$ 7,44   |
|         | 60 dpi | N/A               | N/A               | N/A             | N/A                | N/A             | N/A              | N/A                |
| SCI 4   | 3 dpi  | N/A               | N/A               | N/A             | N/A                | N/A             | N/A              | 11,96 $\pm$ 6,76   |
|         | 7 dpi  | N/A               | N/A               | N/A             | N/A                | N/A             | N/A              | 2,48 $\pm$ 1,71    |
|         | 14 dpi | 40,18 $\pm$ 19,76 | 10,04 $\pm$ 1,88  | 5,13 $\pm$ 3,65 | 63,44 $\pm$ 20,23  | 6,85 $\pm$ 3,95 | 9,14 $\pm$ 3,84  | N/A                |
|         | 60 dpi | 58,92 $\pm$ 24,68 | 32,41 $\pm$ 6,49  | N/A             | 152,04 $\pm$ 49,54 | 5,5 $\pm$ 1,42  | 10,25 $\pm$ 1,87 | 25,13 $\pm$ 9,16*# |

N/A (not available) - protein concentrations are not detectable with the kit.

\*P<0.05 as compared with ISC group. #P<0.05 as compared with Medium group. \*\*P<0.05 as compared with other values at the appropriate time after SCI.

Significant difference is indicated for detectable values.
